# Supplementary material for: Design, Synthesis, and Anticancer Evaluation of Novel Indole Derivatives of Ursolic Acid as Potential Topoisomerase II Inhibitors
Source: PubMed Central journal article supplement (PMC7215373; doi:10.3390/ijms21082876), 2020-04-20
Supplement: ijms-21-02876-s001.pdf [file ijms-21-02876-s001.pdf]

# Supplementary Material

## Design, Synthesis and Anticancer Evaluation of Novel Indole Derivatives of Ursolic Acid as Potential Topoisomerase II Inhibitors

A-Liang Li, Yun Hao, Wen-Yan Wang, Qing-Song Liu, Yue Sun and Wen Gu \*

Jiangsu Provincial Key Lab for the Chemistry and Utilization of Agro-forest Biomass, Jiangsu Key Lab of Biomass-based Green Fuels and Chemicals, Co-Innovation Center for Efficient Processing and Utilization of Forest Products, College of Chemical Engineering, Nanjing Forestry University, Nanjing 210037, P. R. China;

\* Correspondence: njguwen@163.com; (W.G.)

### Figure S1~Figure S42. $^1\text{H}$ and $^{13}\text{C}$ NMR spectra of compounds 4a-f, 5a-f, 6a-f and 7a-c.

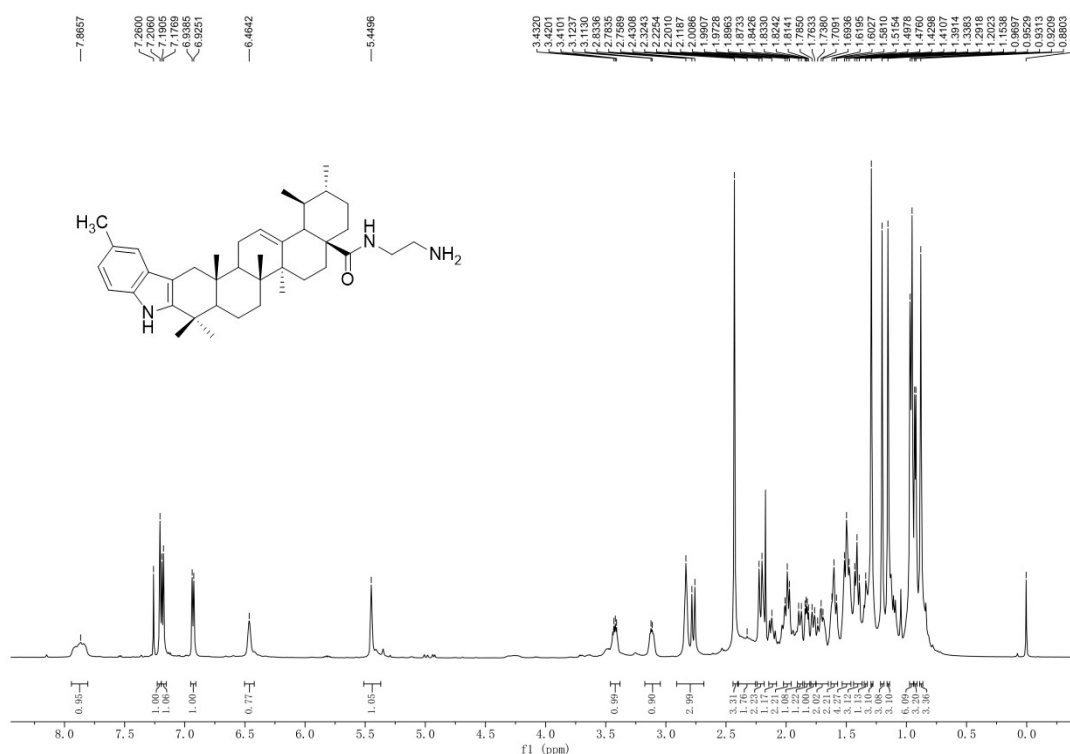

Figure S1.  $^1\text{H}$ -NMR spectrum of compound 4a (600 MHz,  $\text{CDCl}_3$ ).

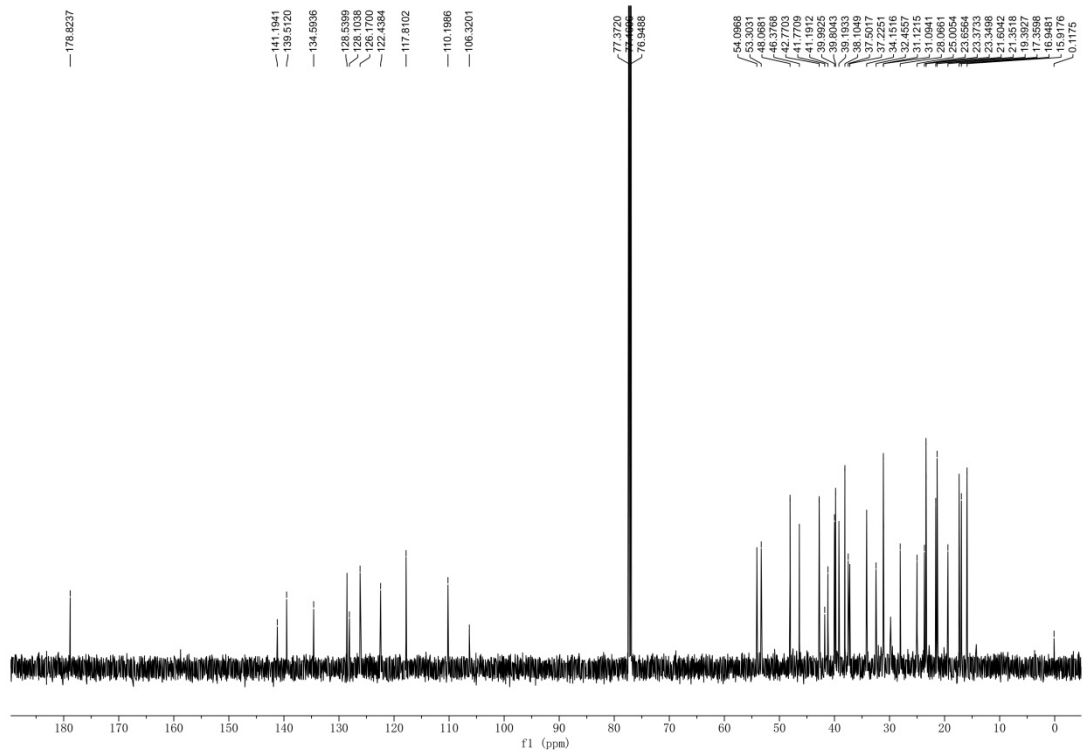

**Figure S2.**  $^{13}\text{C}$ -NMR spectrum of compound **4a** (150 MHz,  $\text{CDCl}_3$ ).

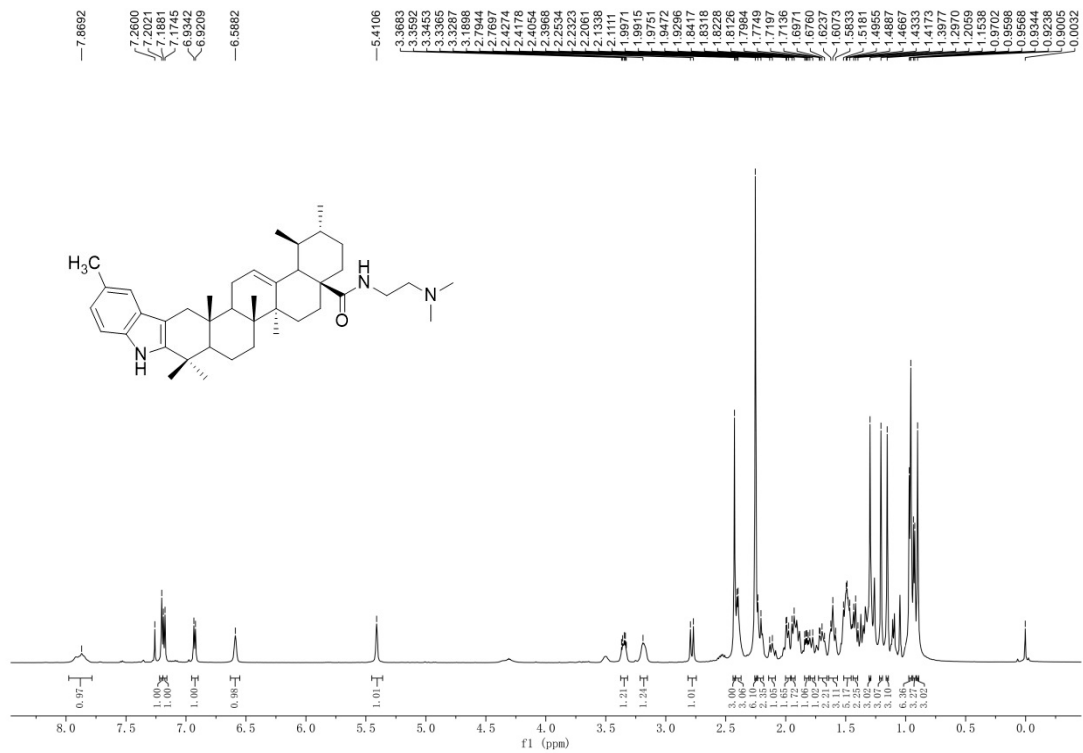

**Figure S3.**  $^1\text{H}$ -NMR spectrum of compound **4b** (600 MHz,  $\text{CDCl}_3$ ).

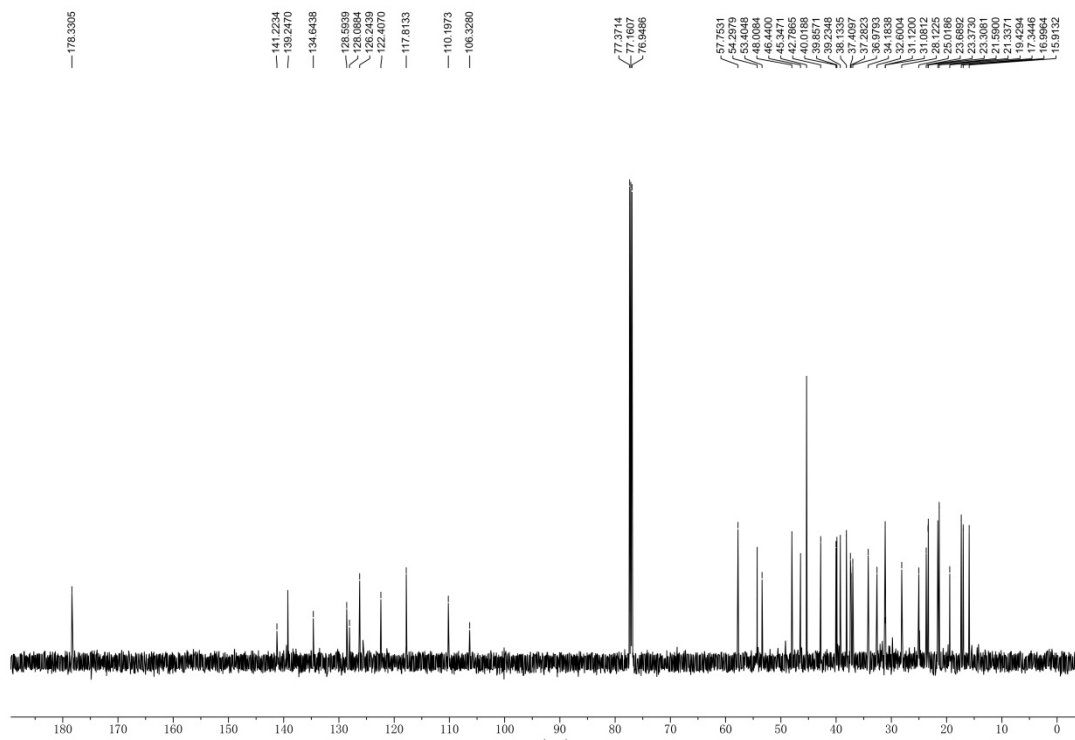

Figure S4.  $^{13}\text{C}$ -NMR spectrum of compound **4b** (150 MHz,  $\text{CDCl}_3$ ).

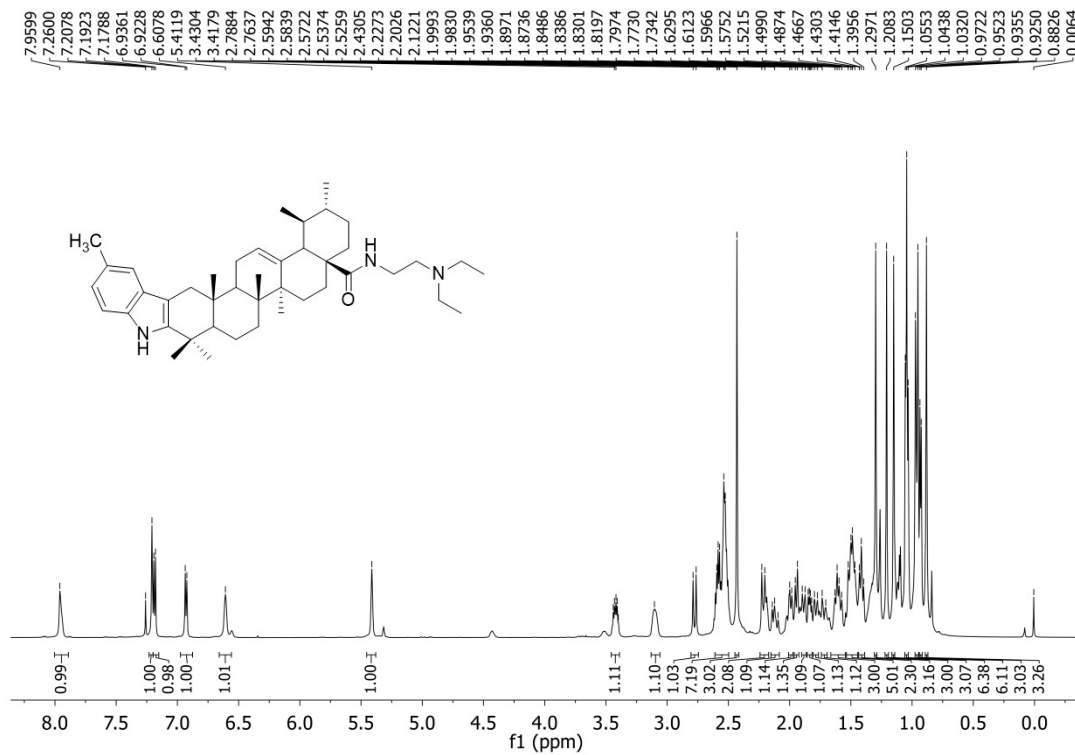

Figure S5.  $^1\text{H}$ -NMR spectrum of compound **4c** (600 MHz,  $\text{CDCl}_3$ ).

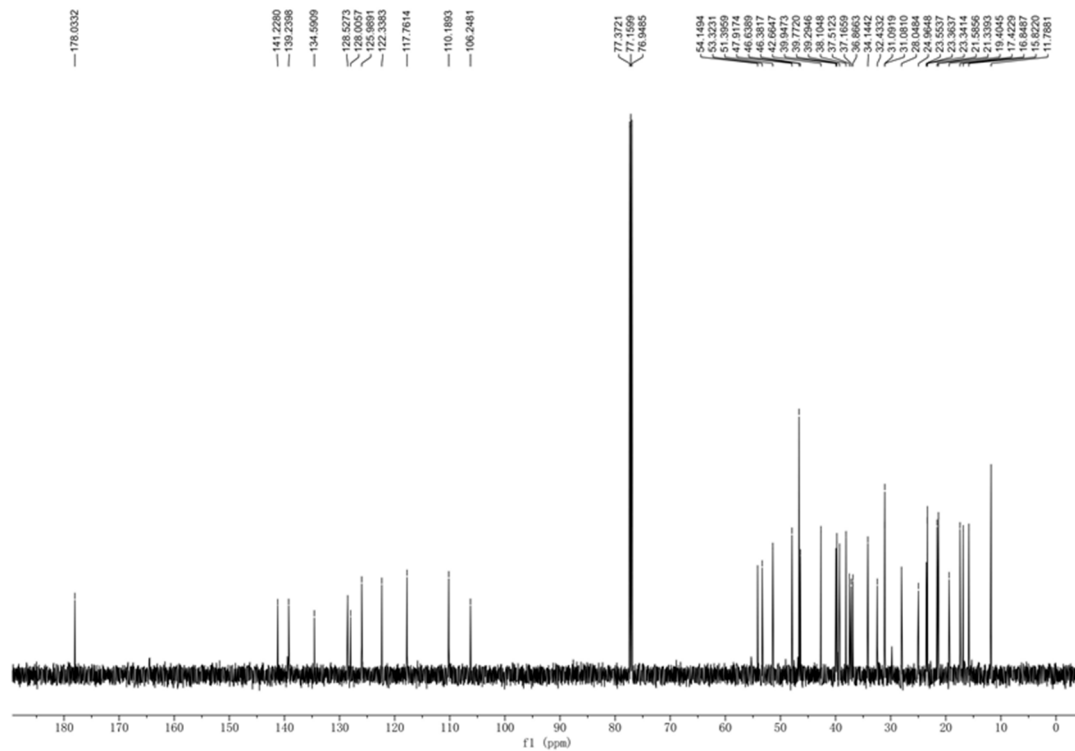

Figure S6.  $^{13}\text{C}$ -NMR spectrum of compound **4c** (150 MHz,  $\text{CDCl}_3$ ).

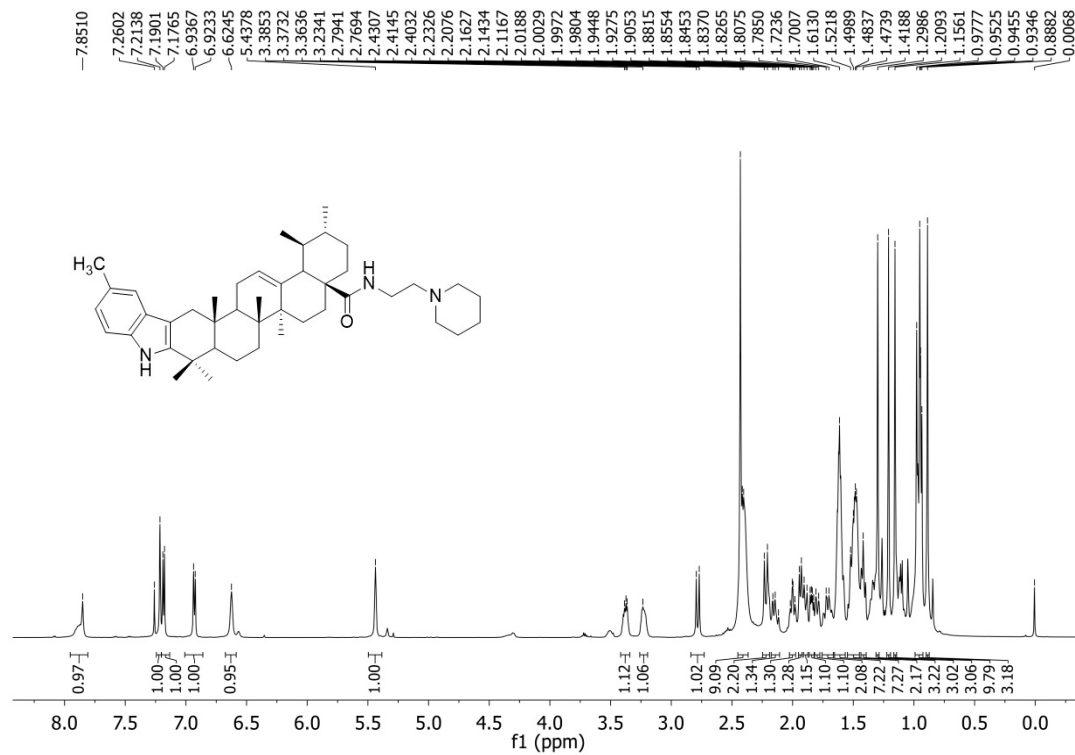

Figure S7.  $^1\text{H}$ -NMR spectrum of compound **4d** (600 MHz,  $\text{CDCl}_3$ ).

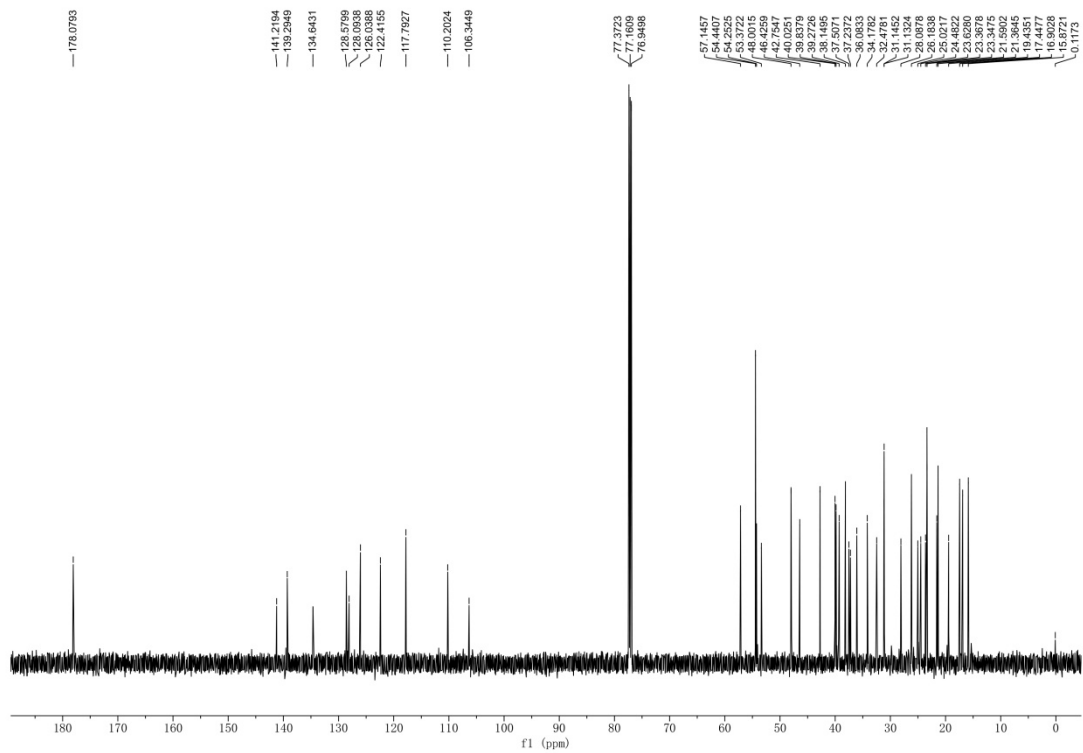

**Figure S8.**  $^{13}\text{C}$ -NMR spectrum of compound **4d** (150 MHz,  $\text{CDCl}_3$ ).

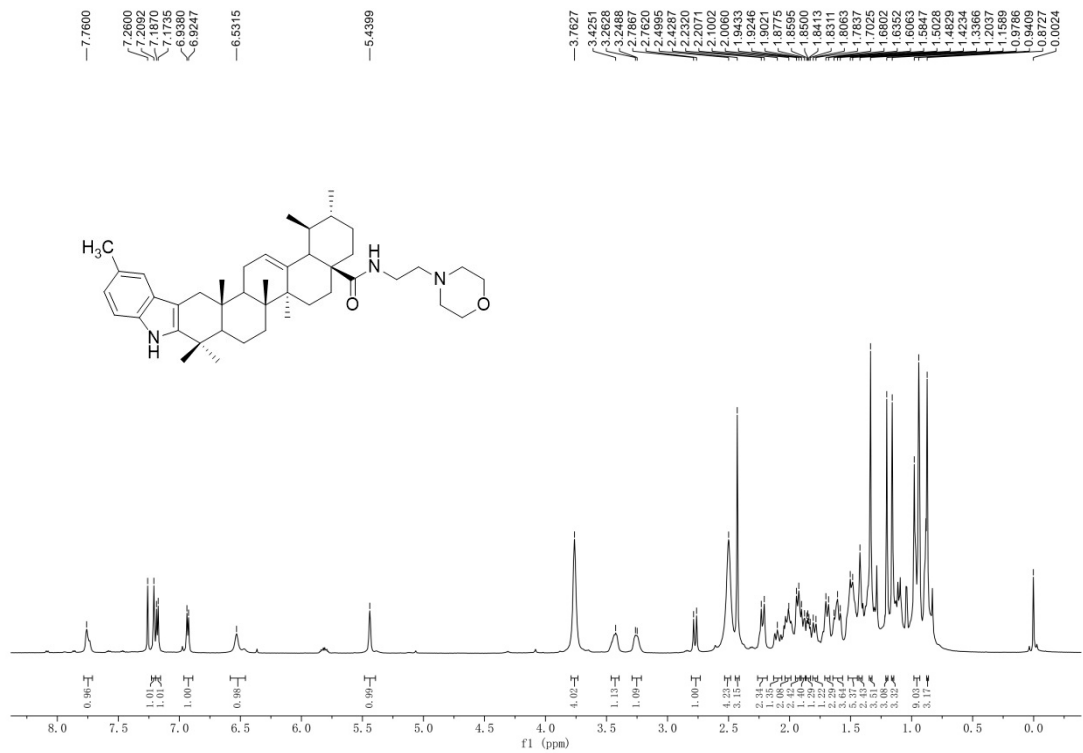

**Figure S9.**  $^1\text{H}$ -NMR spectrum of compound **4e** (600 MHz,  $\text{CDCl}_3$ ).

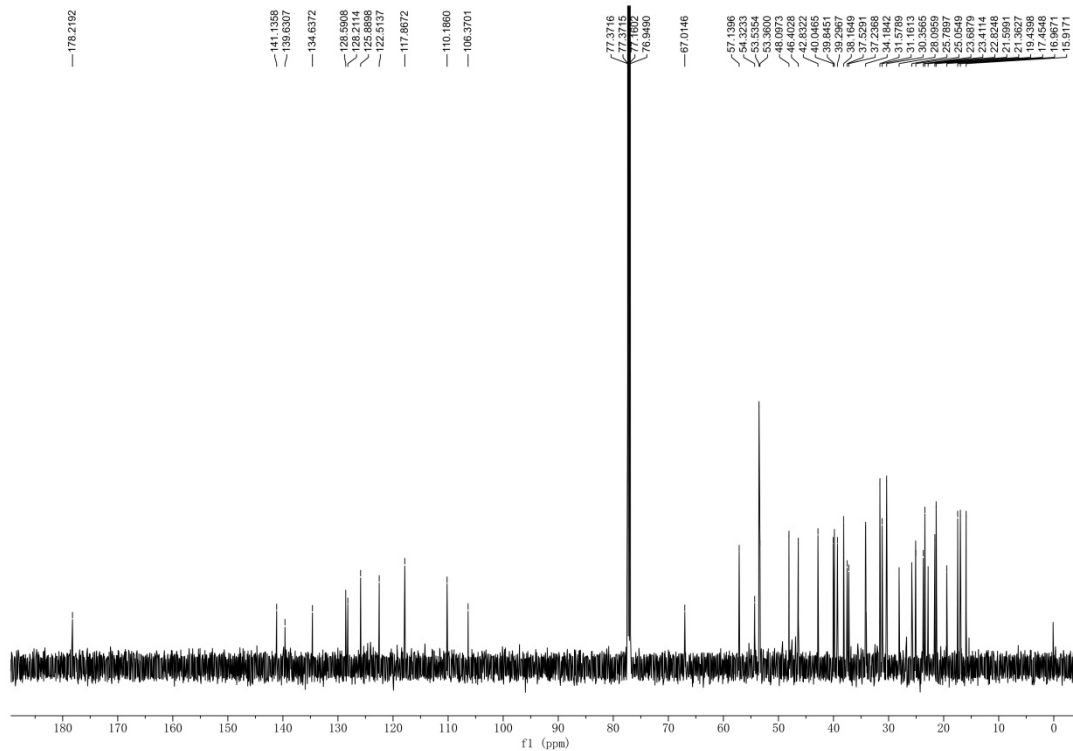

Figure S10.  $^{13}\text{C}$ -NMR spectrum of compound **4e** (150 MHz,  $\text{CDCl}_3$ ).

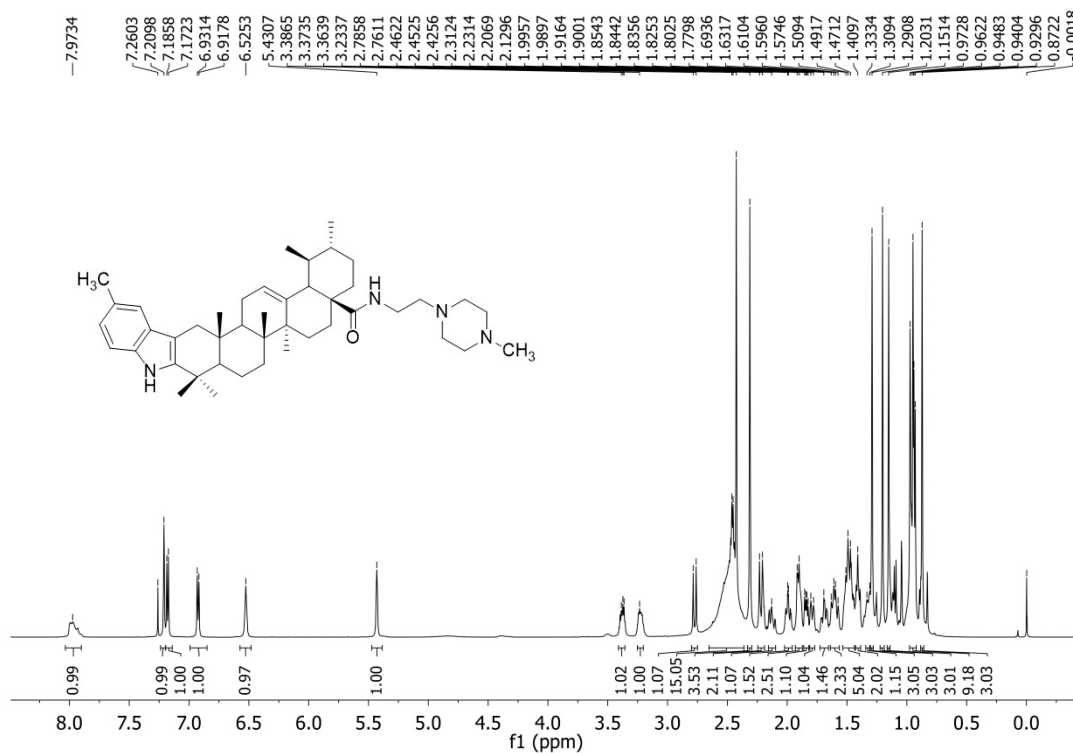

Figure S11.  $^1\text{H}$ -NMR spectrum of compound **4f** (600 MHz,  $\text{CDCl}_3$ ).



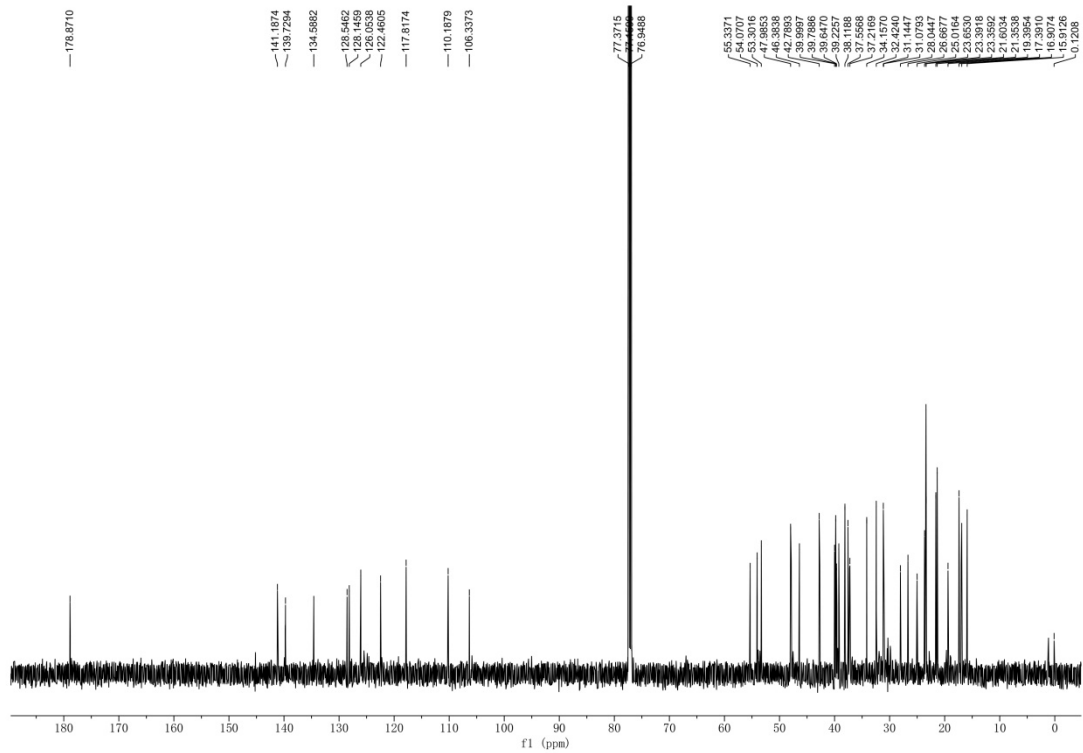

Figure S14.  $^{13}\text{C}$ -NMR spectrum of compound **5a** (150 MHz,  $\text{CDCl}_3$ ).

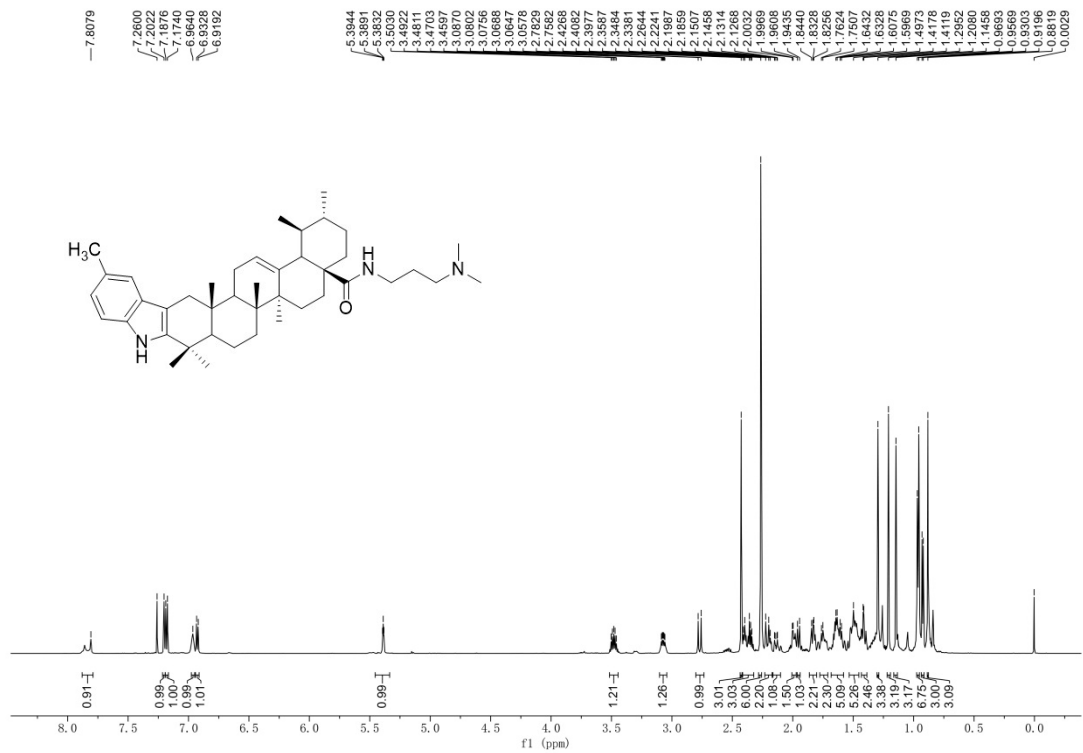

Figure S15.  $^1\text{H}$ -NMR spectrum of compound **5b** (600 MHz,  $\text{CDCl}_3$ ).



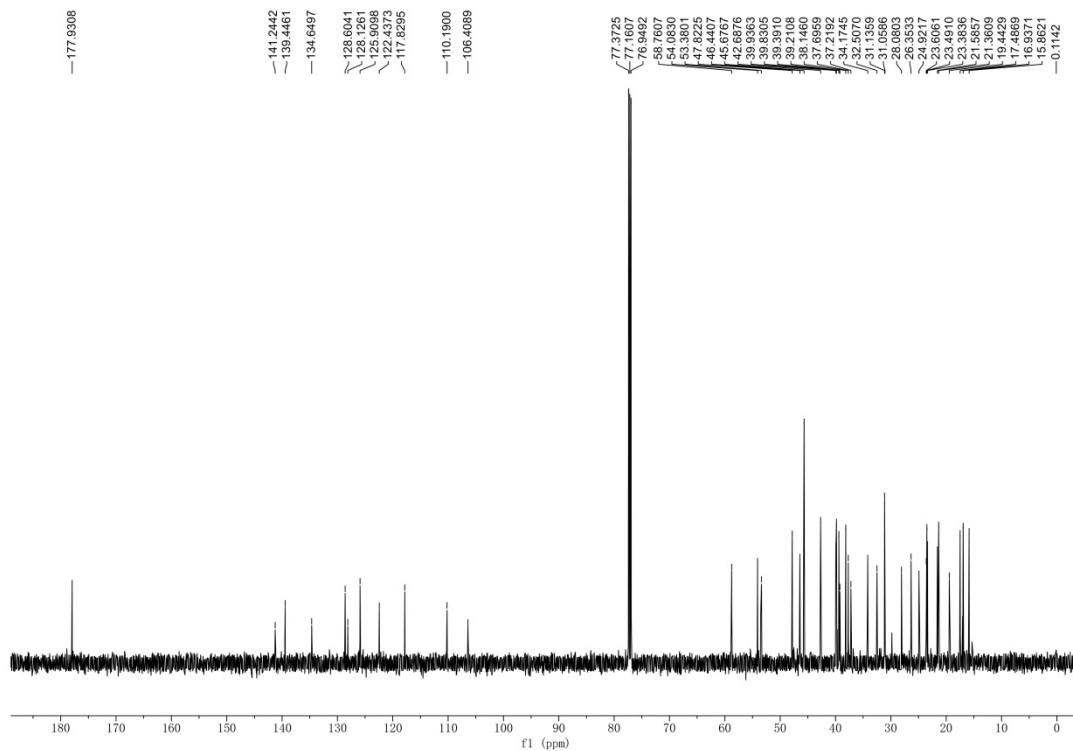

Figure S16.  $^{13}\text{C}$ -NMR spectrum of compound **5b** (150 MHz,  $\text{CDCl}_3$ ).

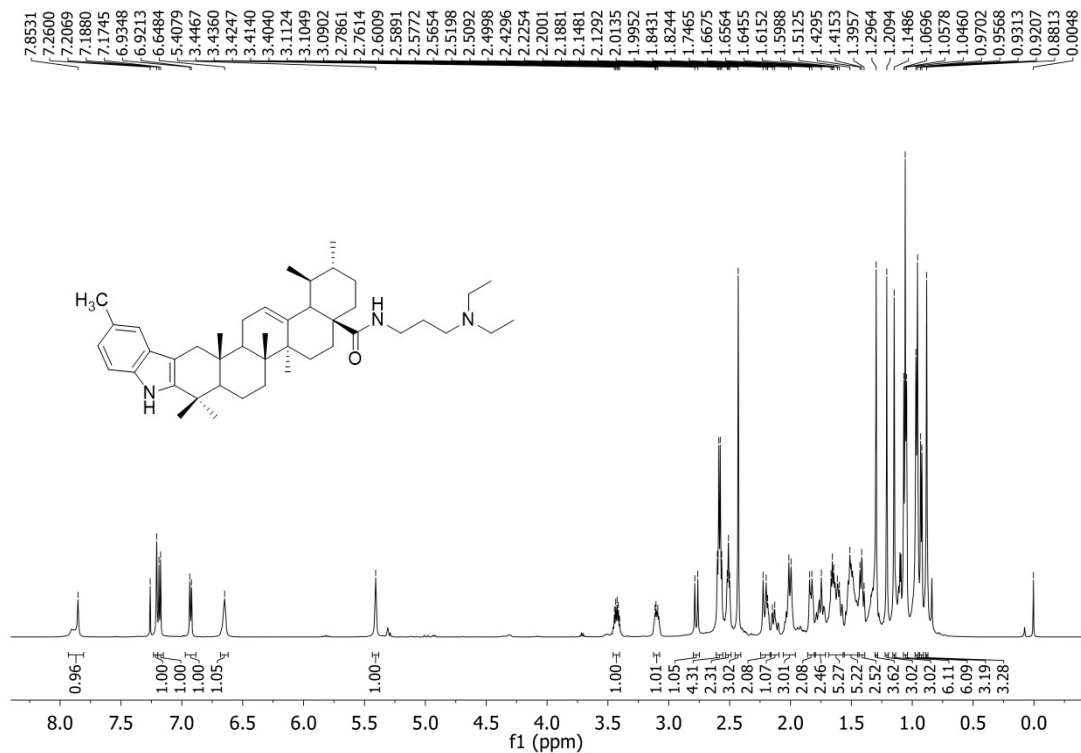

Figure S17.  $^1\text{H}$ -NMR spectrum of compound **5c** (600 MHz,  $\text{CDCl}_3$ ).

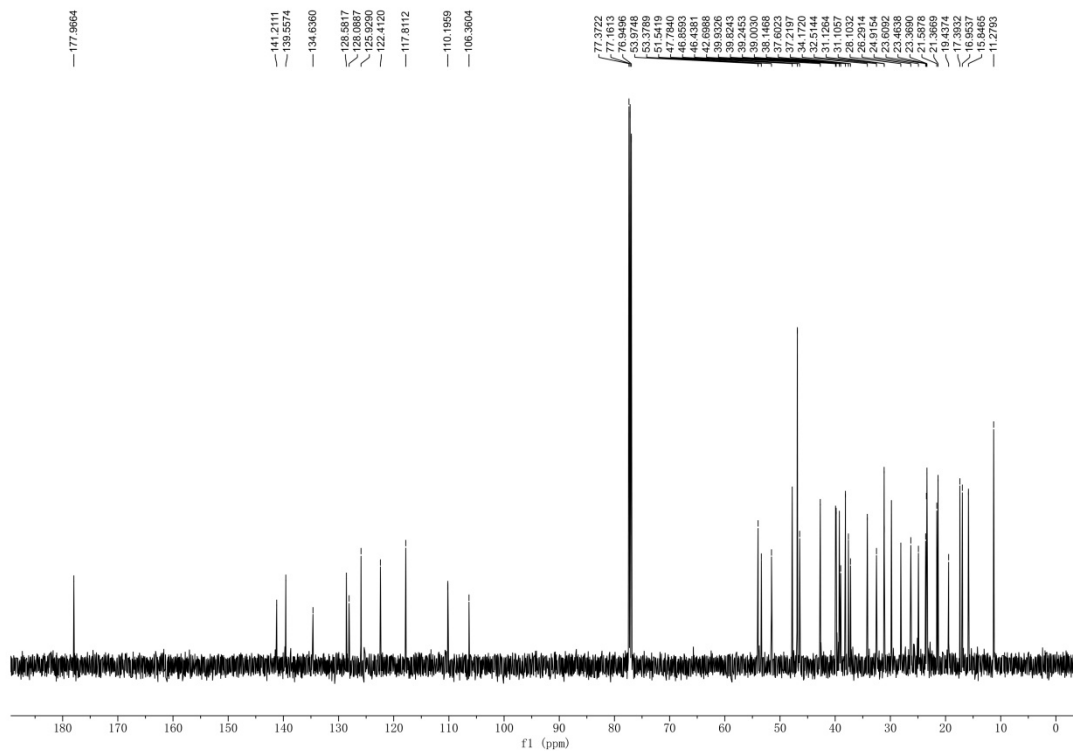

Figure S18.  $^{13}\text{C}$ -NMR spectrum of compound **5c** (150 MHz,  $\text{CDCl}_3$ ).

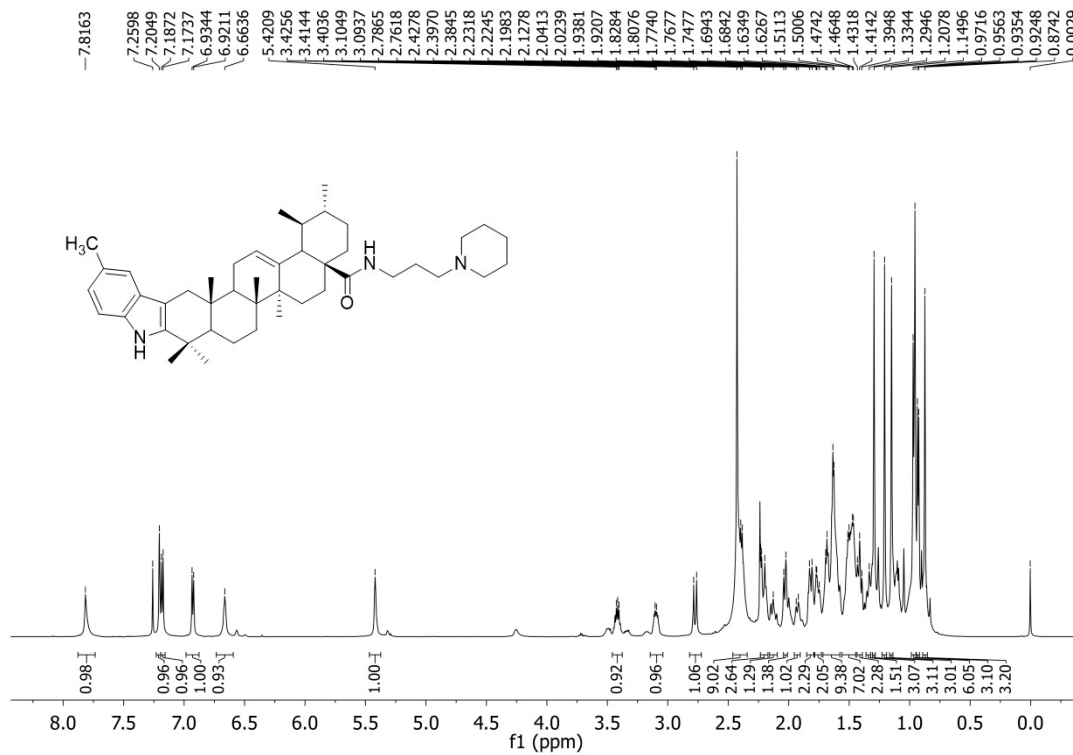

Figure S19.  $^1\text{H}$ -NMR spectrum of compound **5d** (600 MHz,  $\text{CDCl}_3$ ).

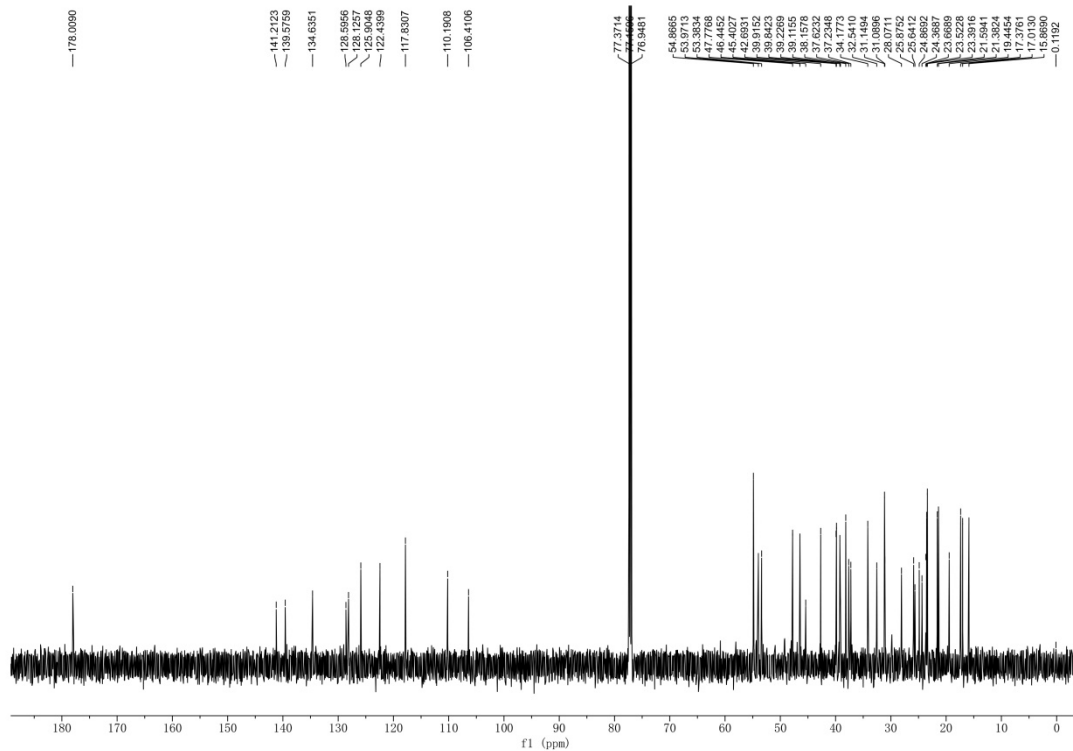

Figure S20.  $^{13}\text{C}$ -NMR spectrum of compound 5d (150 MHz,  $\text{CDCl}_3$ ).

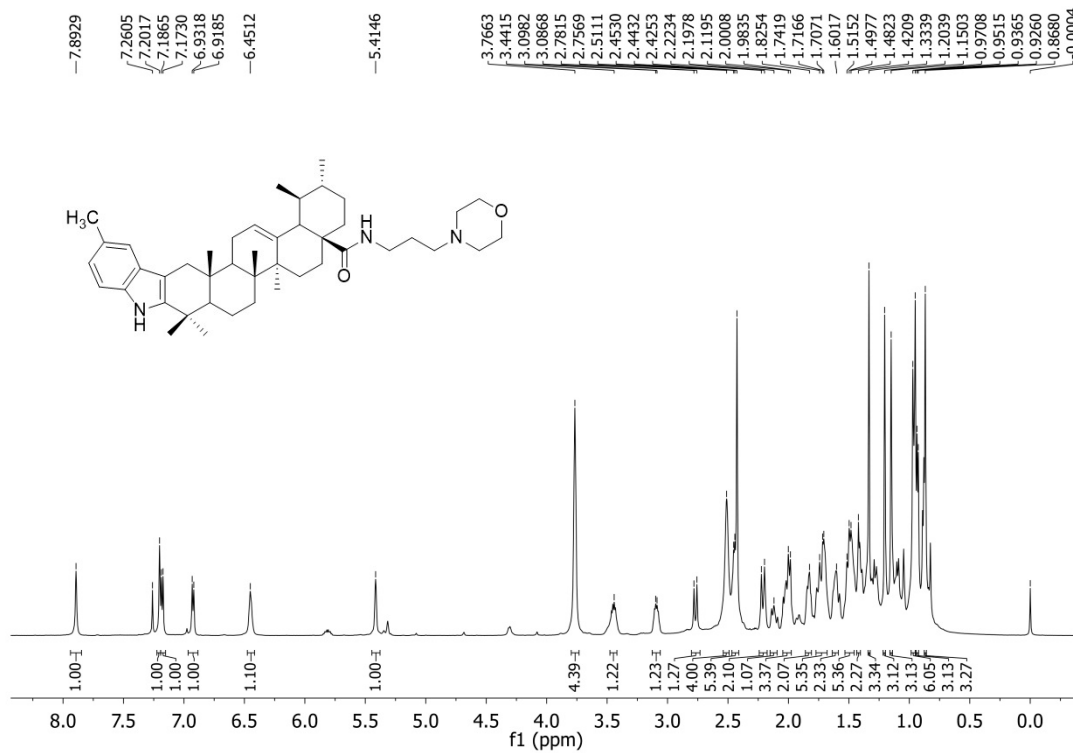

Figure S21.  $^1\text{H}$ -NMR spectrum of compound 5e (600 MHz,  $\text{CDCl}_3$ ).

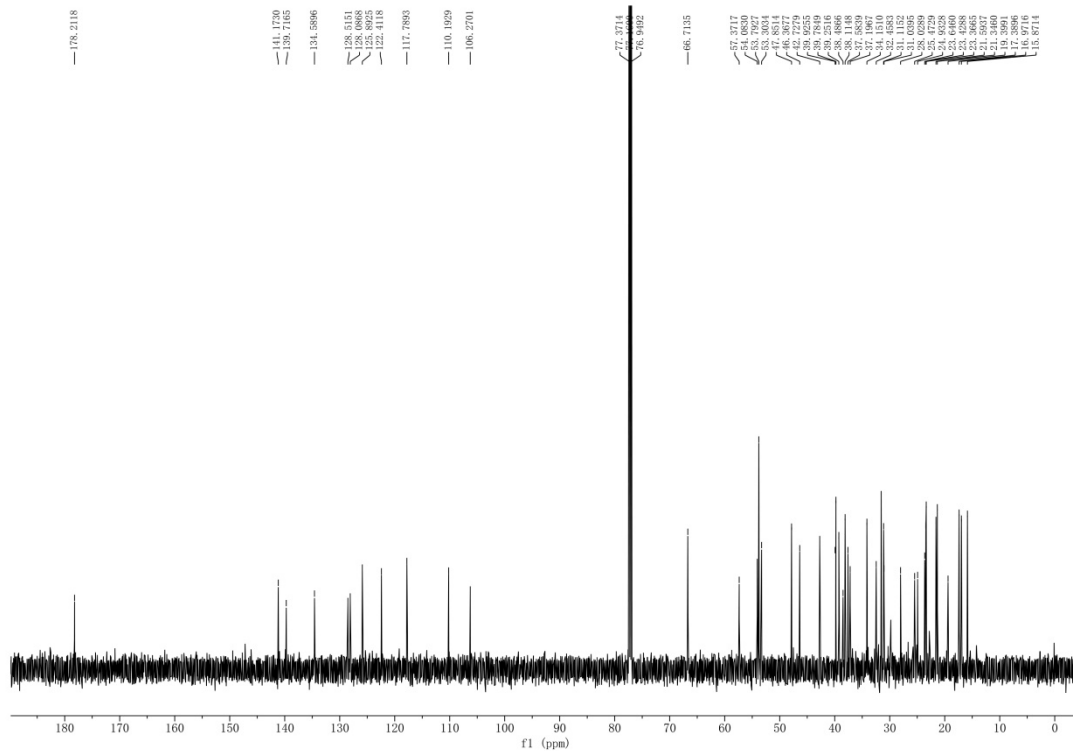

Figure S22.  $^{13}\text{C}$ -NMR spectrum of compound **5e** (150 MHz,  $\text{CDCl}_3$ ).

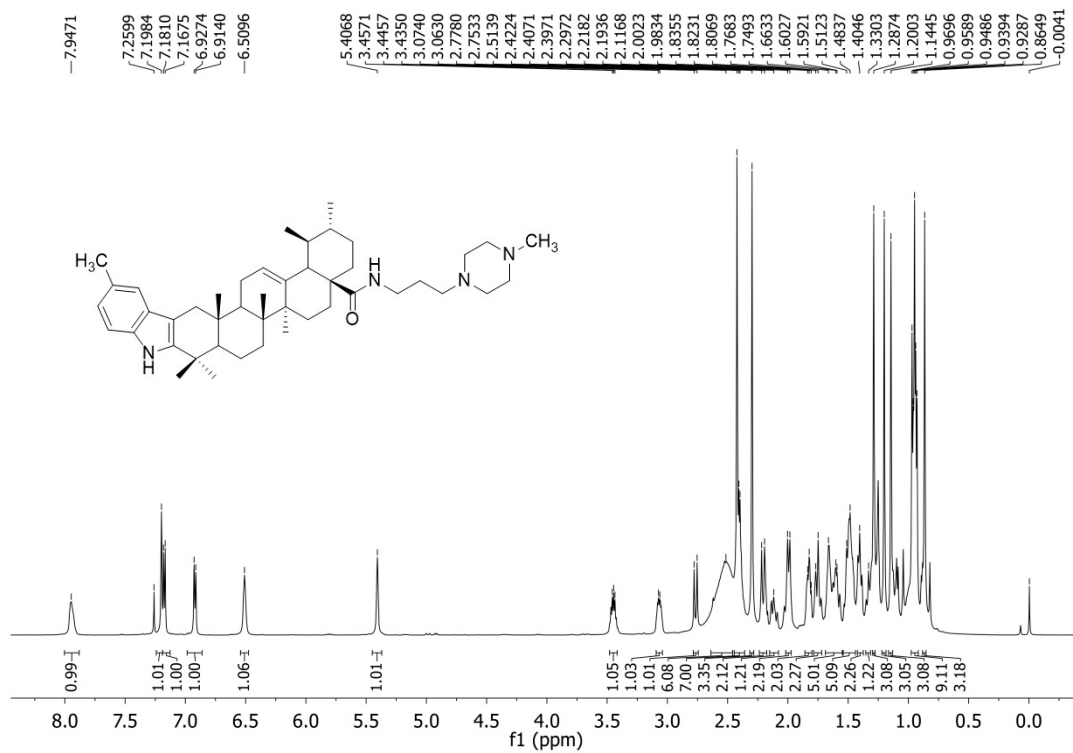

Figure S23.  $^1\text{H}$ -NMR spectrum of compound **5f** (600 MHz,  $\text{CDCl}_3$ ).

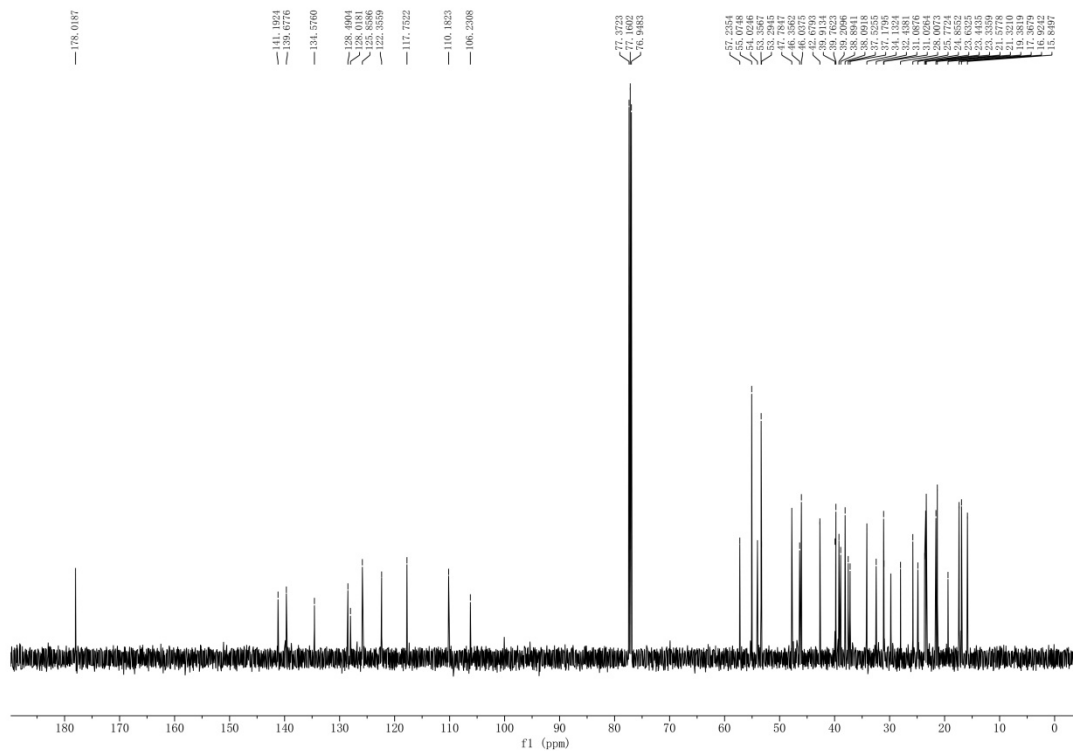

Figure S24.  $^{13}\text{C}$ -NMR spectrum of compound **5f** (150 MHz,  $\text{CDCl}_3$ ).

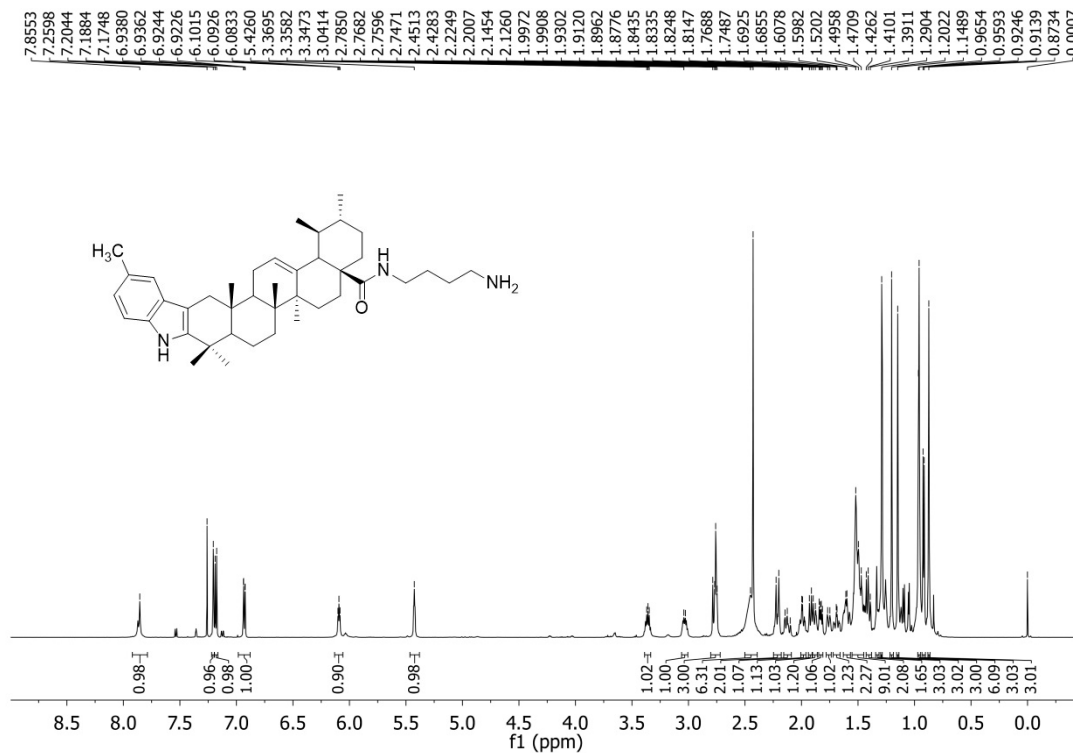

Figure S25.  $^1\text{H}$ -NMR spectrum of compound **6a** (600 MHz,  $\text{CDCl}_3$ ).

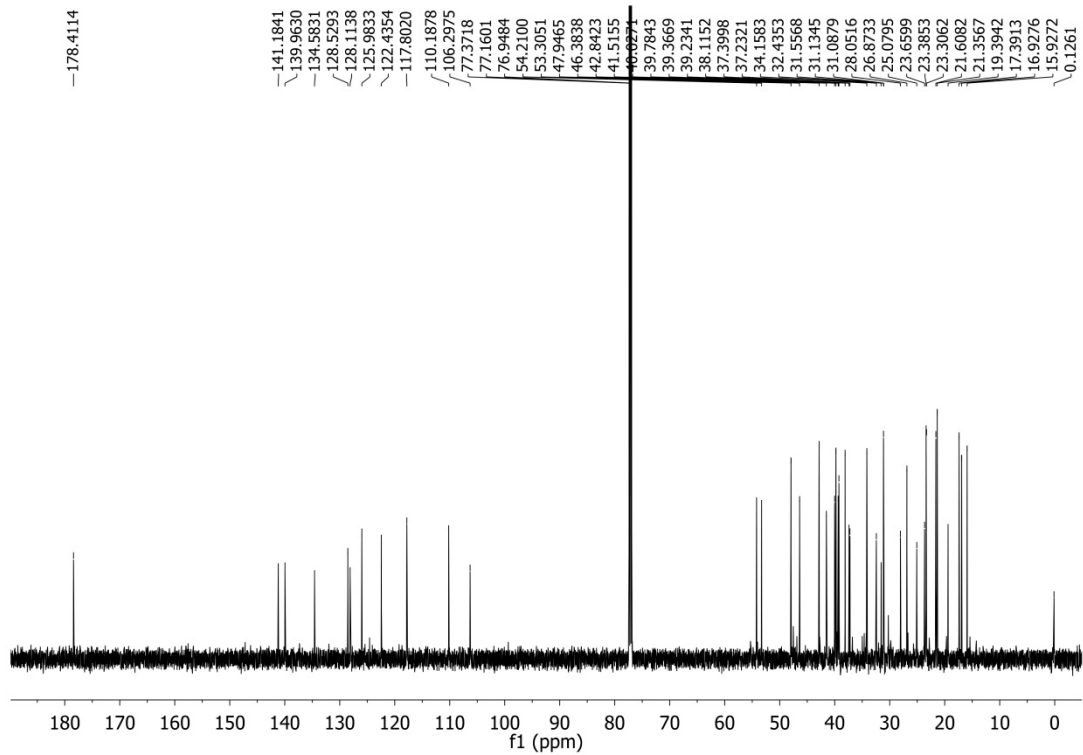

Figure S26.  $^{13}\text{C}$ -NMR spectrum of compound **6a** (150 MHz,  $\text{CDCl}_3$ ).

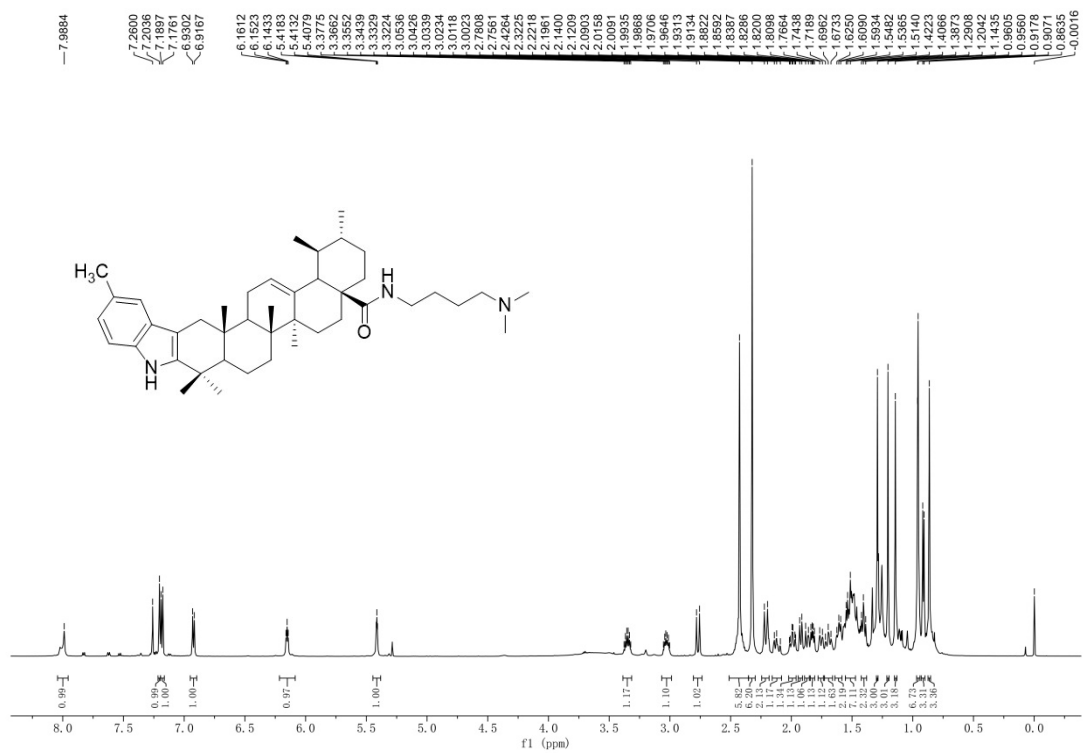

Figure S27.  $^1\text{H}$ -NMR spectrum of compound **6b** (600 MHz,  $\text{CDCl}_3$ ).

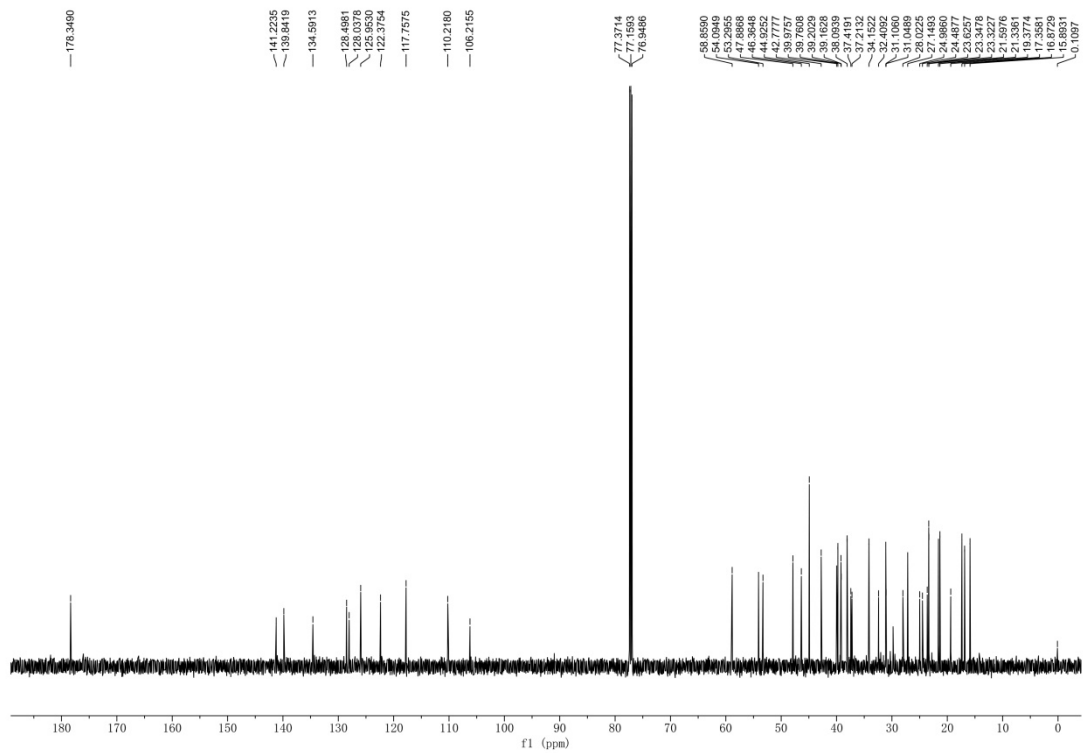

Figure S28.  $^{13}\text{C}$ -NMR spectrum of compound **6b** (150 MHz,  $\text{CDCl}_3$ ).

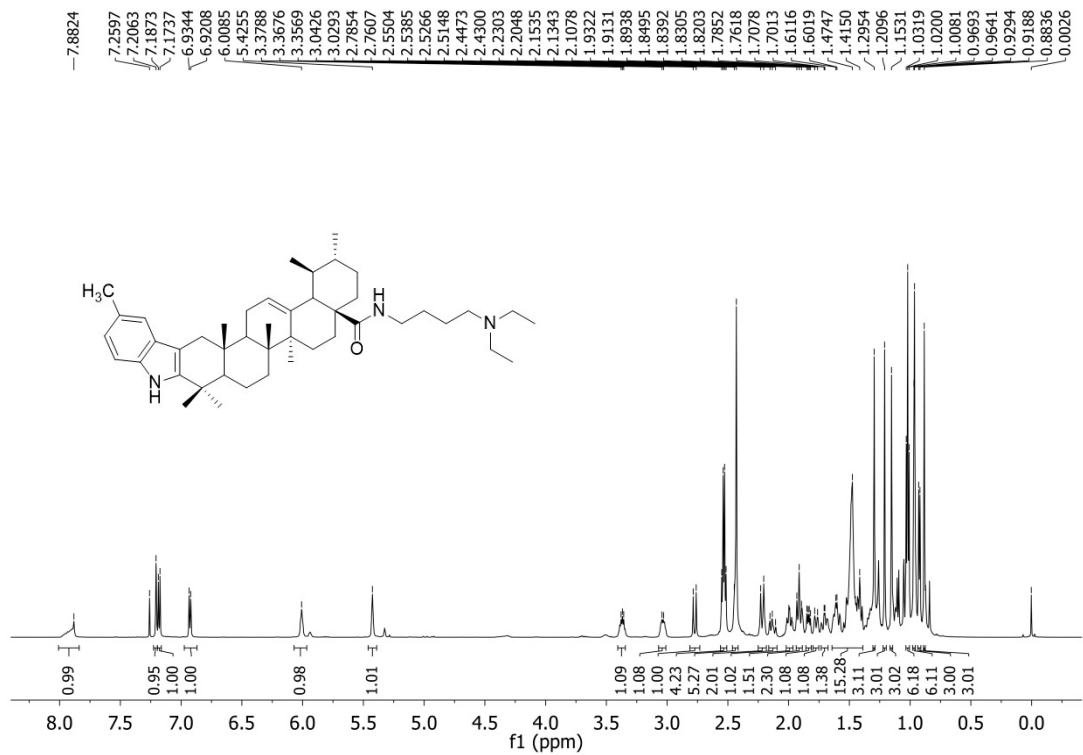

Figure S29.  $^1\text{H}$ -NMR spectrum of compound **6c** (600 MHz,  $\text{CDCl}_3$ ).

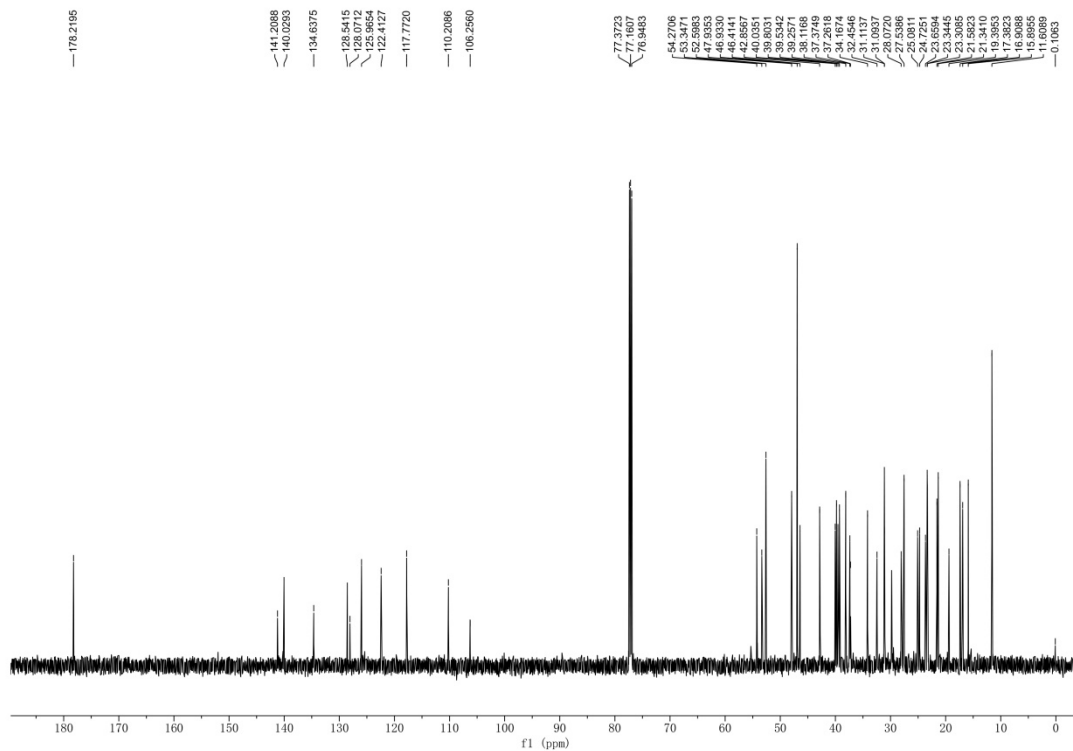

Figure S30.  $^{13}\text{C}$ -NMR spectrum of compound **6c** (150 MHz,  $\text{CDCl}_3$ ).

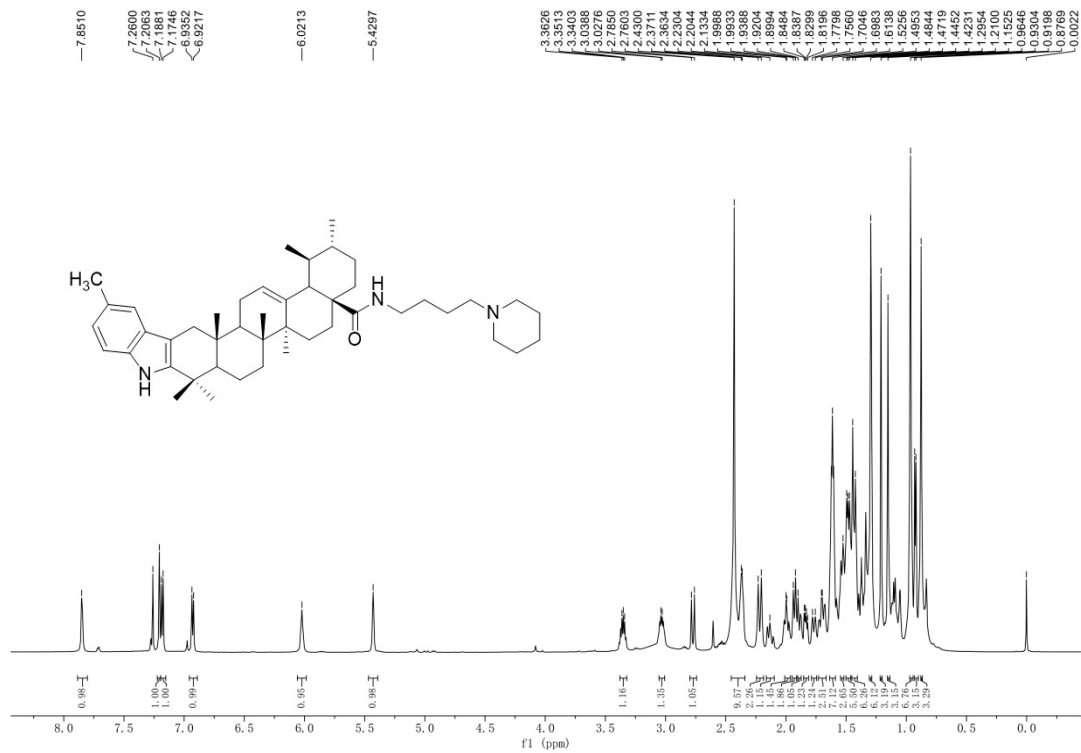

Figure S31.  $^1\text{H}$ -NMR spectrum of compound **6d** (600 MHz,  $\text{CDCl}_3$ ).



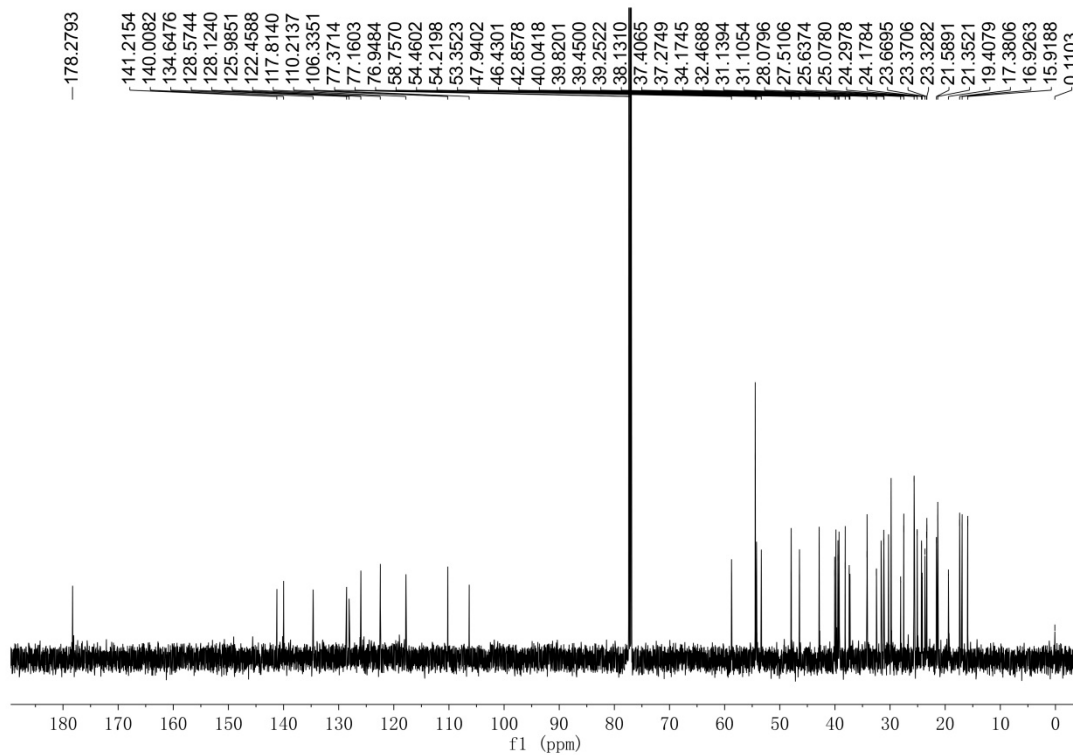

Figure S32.  $^{13}\text{C}$ -NMR spectrum of compound **6d** (150 MHz,  $\text{CDCl}_3$ ).

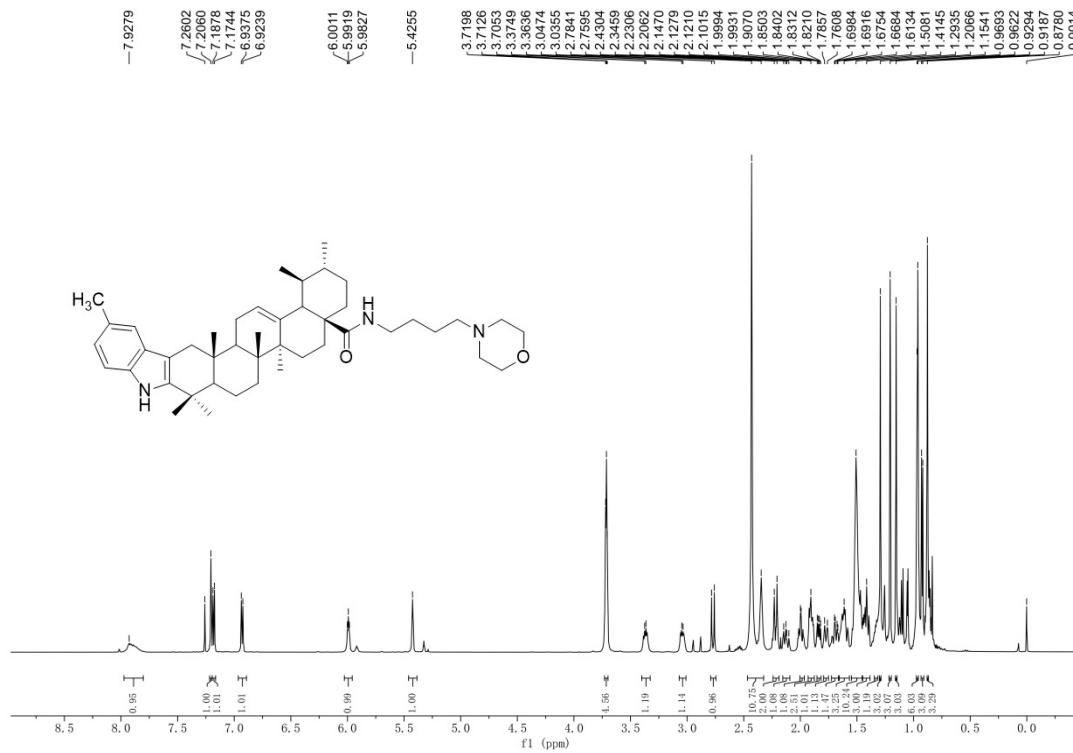

Figure S33.  $^1\text{H}$ -NMR spectrum of compound **6e** (600 MHz,  $\text{CDCl}_3$ ).

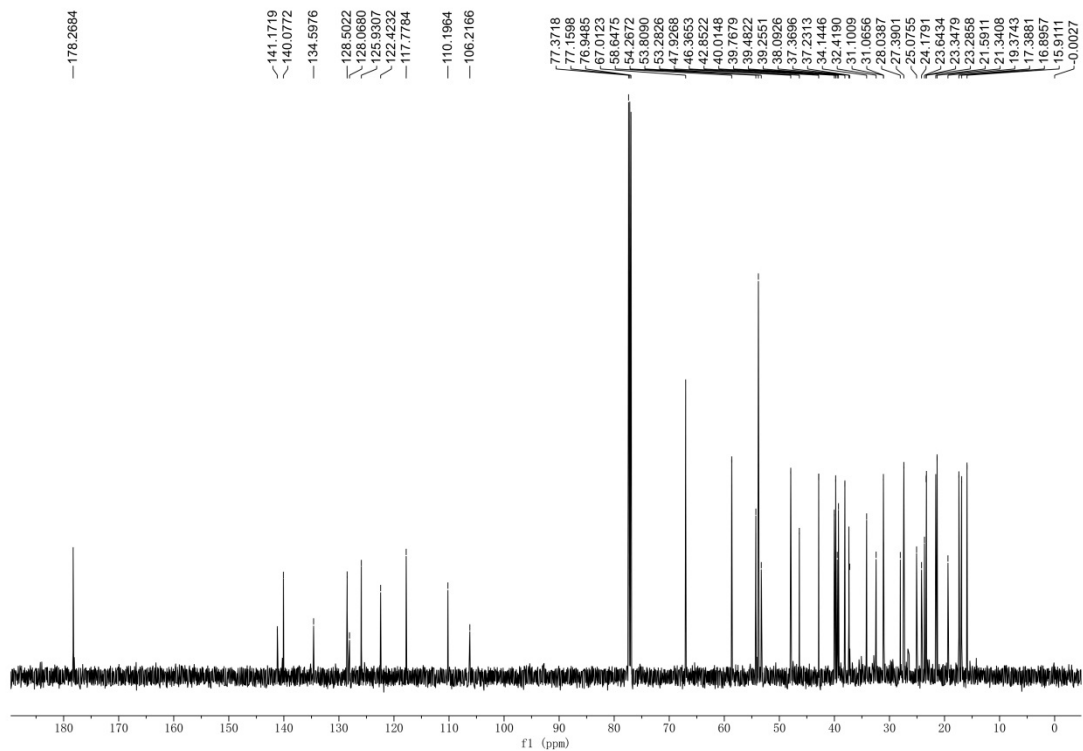

Figure S34.  $^{13}\text{C}$ -NMR spectrum of compound **6e** (600 MHz,  $\text{CDCl}_3$ ).

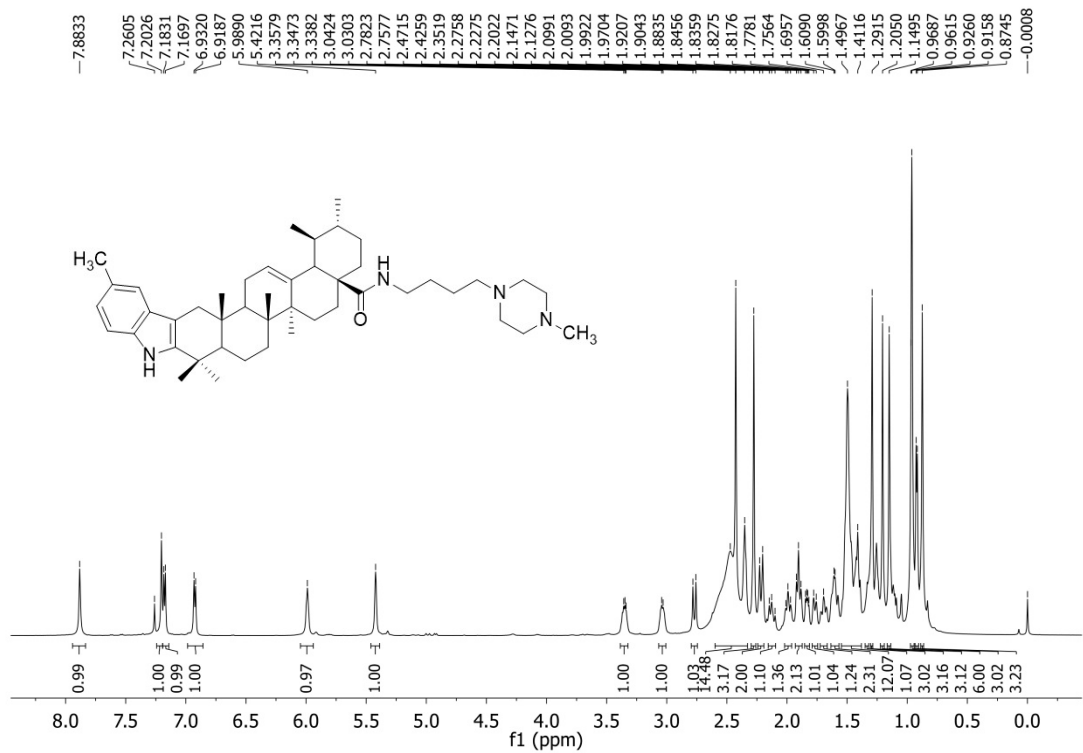

Figure S35.  $^1\text{H}$ -NMR spectrum of compound **6f** (600 MHz,  $\text{CDCl}_3$ ).

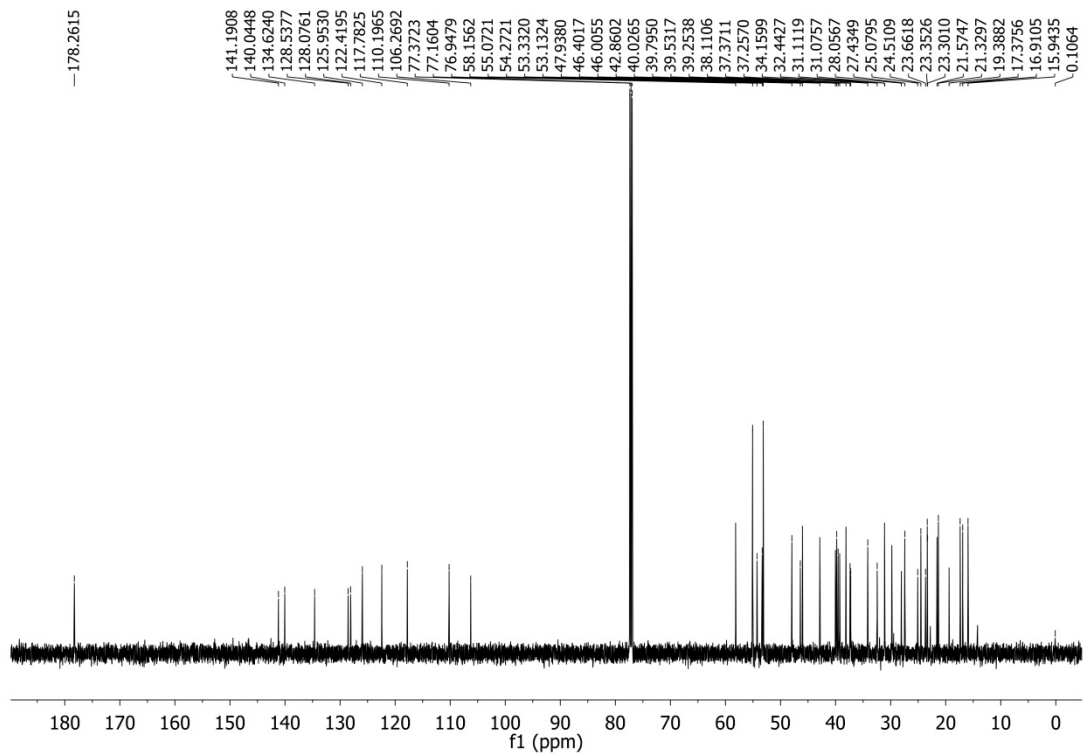

Figure S36.  $^{13}\text{C}$ -NMR spectrum of compound **6f** (150 MHz,  $\text{CDCl}_3$ ).

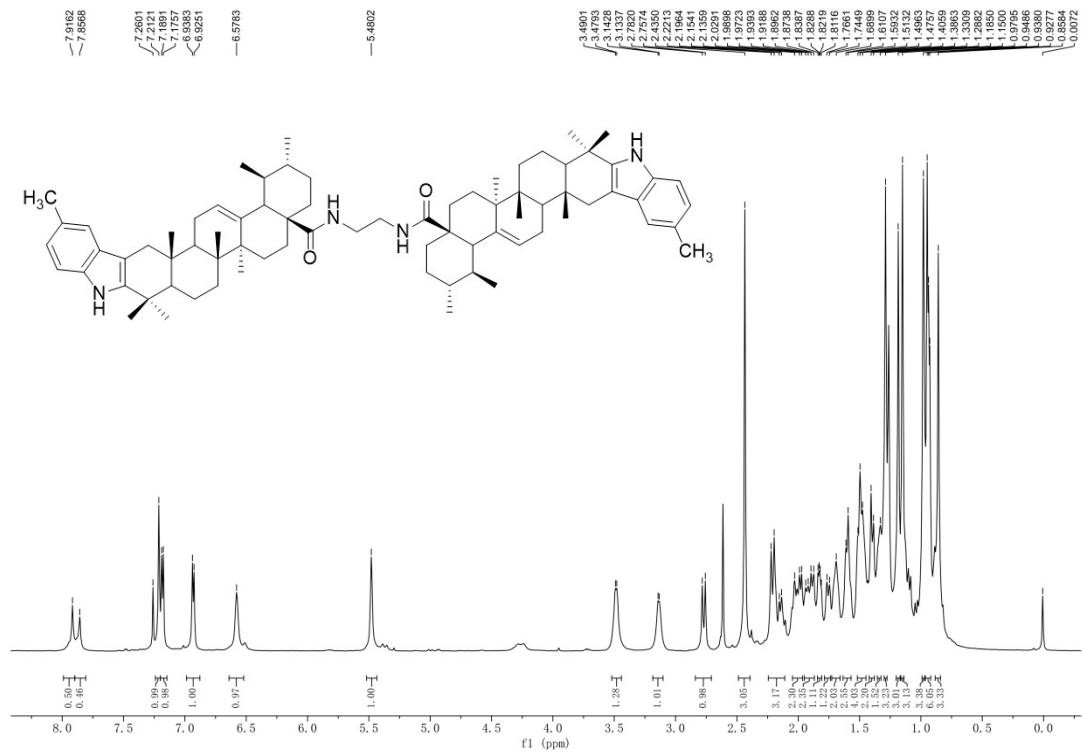

Figure S37.  $^1\text{H}$ -NMR spectrum of compound **7a** (600 MHz,  $\text{CDCl}_3$ ).

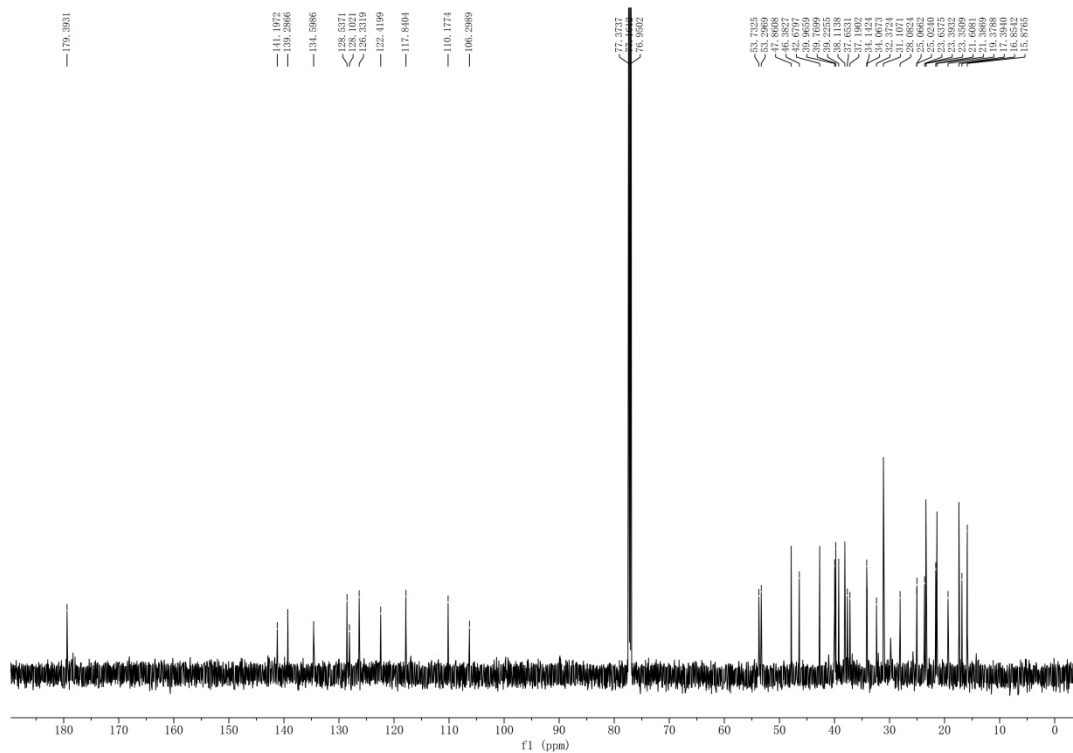

Figure S38.  $^{13}\text{C}$ -NMR spectrum of compound **7a** (150 MHz,  $\text{CDCl}_3$ ).

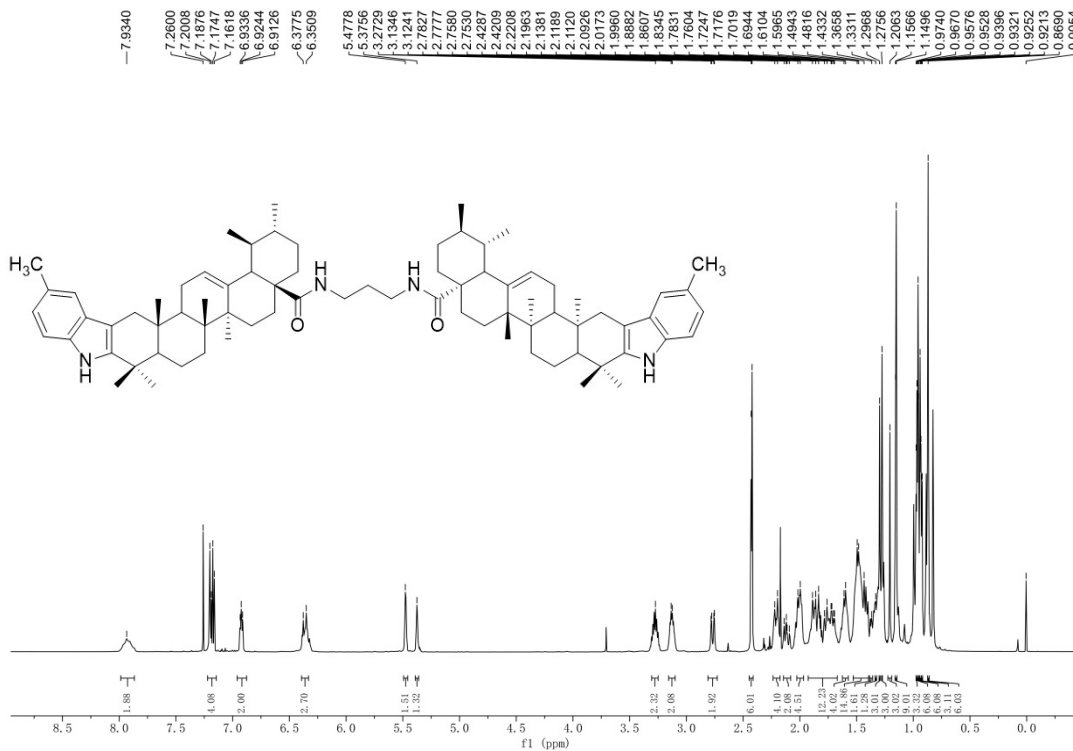

Figure S39.  $^1\text{H}$ -NMR spectrum of compound **7b** (600 MHz,  $\text{CDCl}_3$ ).

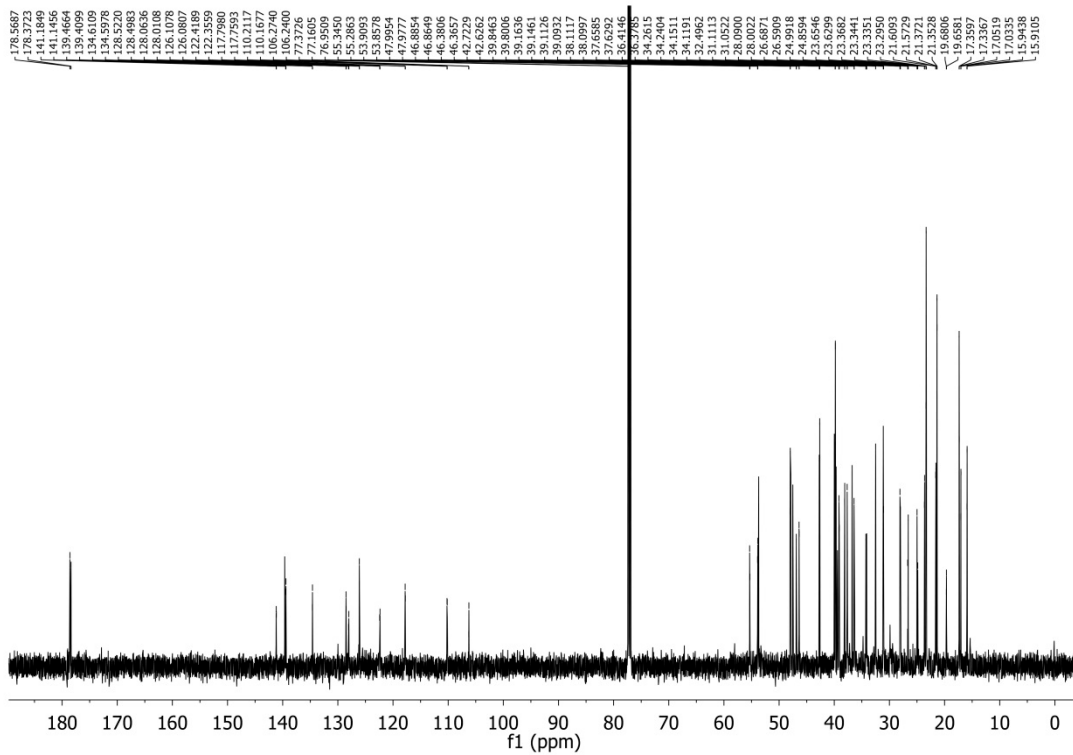

Figure S40.  $^{13}\text{C}$ -NMR spectrum of compound **7b** (150 MHz,  $\text{CDCl}_3$ ).

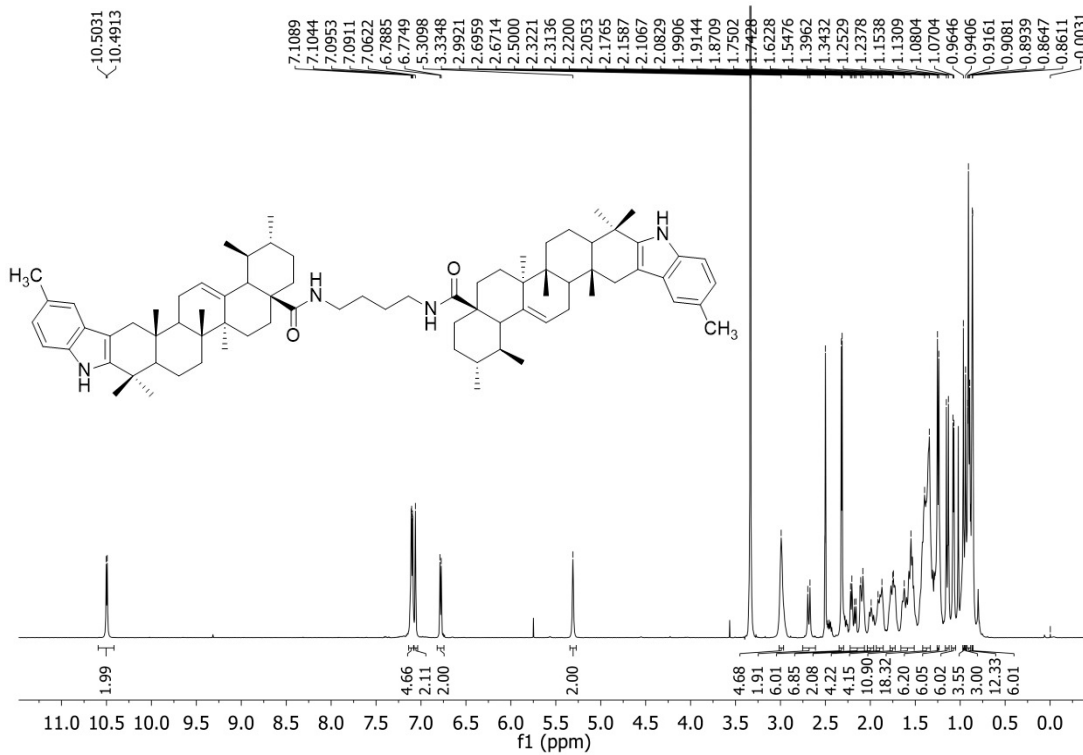

Figure S41.  $^1\text{H}$ -NMR spectrum of compound **7c** (600 MHz,  $\text{CDCl}_3$ ).

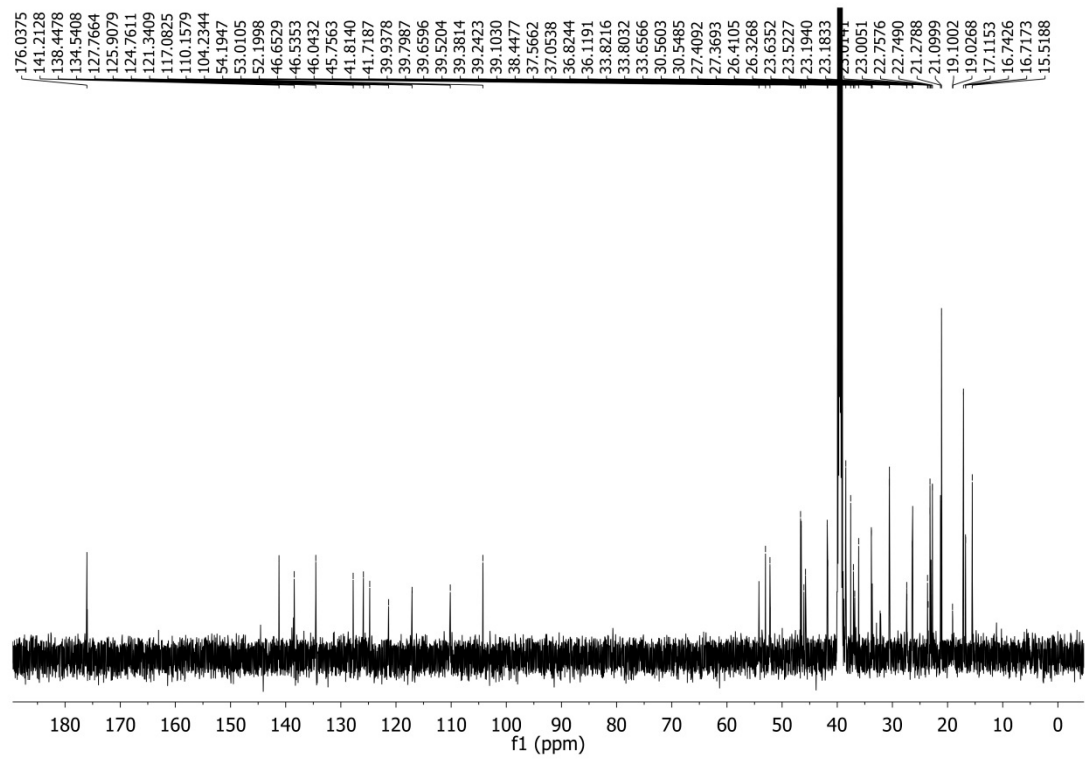

**Figure S42.**  $^{13}\text{C}$ -NMR spectrum of compound **7c** (150 MHz,  $\text{CDCl}_3$ ).
